# Supplementary material
Source: publisher site journal article supplement (https://www.spandidos-publications.com/3668/downloadSupplementary)
Supplement: Supplementary file 1 [file downloadSupplementary]

Figure S1. Box-and-whisker plot; interquartile range of recurrence-free survival.

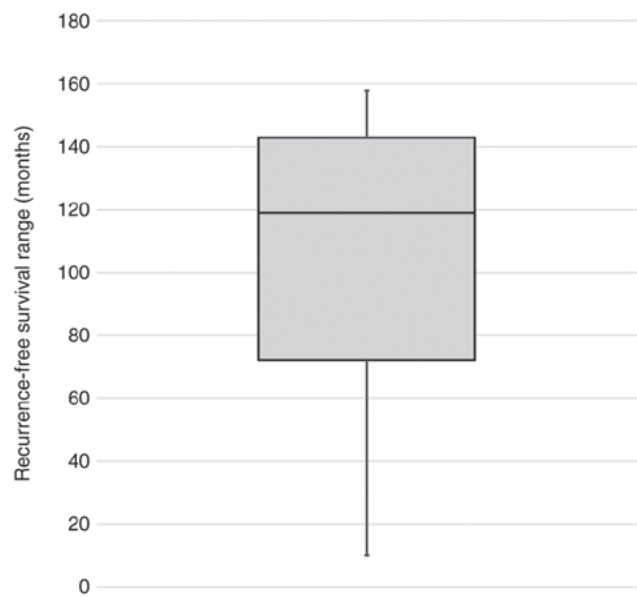

Figure S2. Survival curves of the patients with luminal A- and B-like breast cancers. A significant difference in survival rate was observed between the luminal A- and B-like subtypes.

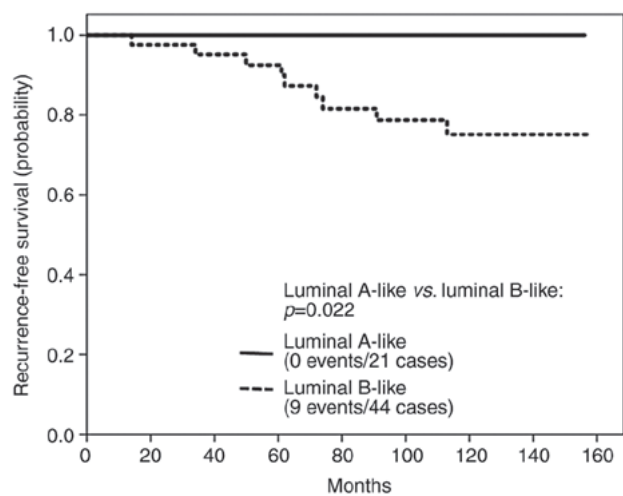

Table SI. Results of the multivariate analysis of the clinicopathological factors that influence breast cancer recurrence.

| Characteristics                                                  | P-value |
|------------------------------------------------------------------|---------|
| Tumor-infiltrating lymphocyte count<br>Low vs. intermediate/high | 0.98    |
| Nuclear grade<br>1-2 vs. 3                                       | 0.30    |
| Ki67<br>Low ( $\leq 10\%$ ) vs. high ( $> 10\%$ )                | 0.11    |
| Progesterone receptor<br>Negative vs. positive                   | 0.04    |
| Pathological T status<br>T1-2 vs. T3-4                           | 0.26    |
| Nodal status<br>Negative vs. positive                            | 0.93    |
